# Supplementary material
Source: PubMed Central journal article supplement (PMC3479516)
Supplement: 1213960109_pnas.201213960SI.pdf [file 1213960109_pnas.201213960SI.pdf]

# Supporting Information

Tesla et al. 10.1073/pnas.1213960109

## SI Materials and Methods

**Accelerating Rotarod.** Beginning on day 50, mice were trained on the accelerating rotarod, using Columbus Instruments Rotamex-5. Training consisted of mice being placed on a rotarod moving at 5 rpm for 300 s. Mice were trained to stay on the rotarod for the entire 300 s. If a mouse fell, it was placed back on the rotarod and the 300-s trial was started again. Training took place on two consecutive days. On day 52, mice ran their first full rotarod test, as described in *Current Protocols for Neuroscience* (1). The rotarod began at 4 rpm and accelerated to 40 rpm over 600 s, increasing by 1.25 rpm every 20 s. The time to fall was automatically recorded. Each run was separated by 20 min to allow the mice to rest, and each mouse participated in four runs. Mice were run every 7 d until the time at which they were unable to stay on the rotarod for more than 10 s for three trials.

**Paw Print Analysis.** Five measurements were taken: front and back stride, front and back width, and front-to-back distance, as described in *Current Protocols for Neuroscience* (2). Twenty total measures were taken for each measurement. Front stride and back stride were collected as a straight line from paw print to the following paw print. Front-to-back distance was collected as a straight line from back paw print to corresponding front paw print. Correspondence was based on closest front footprint. Width from paw print was measured by drawing a line at a 90° angle from the line connecting the previous stride and the paw being analyzed. The distance was recorded as length of line from paw to the stride line opposite the paw print. Mice attaining a score of 3 were eliminated from analysis as measurements could not be taken for a foot not being used in forward motion.

**Neurological Scoring.** Neurological scoring was performed every day starting with compound treatment at 80 d and was determined as follows: 0, full extension of hind legs away from lateral midline when the test mouse was suspended by its tail and could hold this for 2 s, suspended two to three times; 1, collapse or partial collapse of leg extension toward lateral midline (weakness) or trembling of hind legs during tail suspension; 2, toes curl under at least twice during walking of 12 inches or any part of foot drags along cage bottom/table; 3, rigid paralysis or minimal joint movement, foot not being used for forward motion; and 4, mouse cannot right itself within 30 s from either side. Upon reaching a score of 2, animals were given a fresh Petri dish with wet food in the dish daily. When mice achieved a score of 4 for two consecutive days, they were euthanized.

**Synthesis and Preparation of P7C3A20.** Scheme S1. Synthesis of P7C3-A20 3,6-dibromo-9-(oxiran-2-ylmethyl)-9H-carbazole.

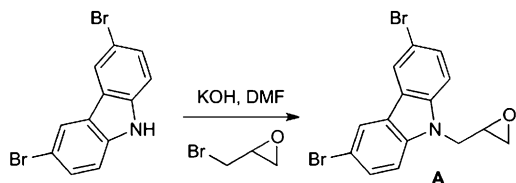

P7C3-A20 was synthesized using a modification of a procedure described previously (1). Thus, following a literature procedure (2), powdered KOH (0.103 g, 1.85 mmol) was added to a solution of 3,6-dibromocarbazole (0.500 g, 1.54 mmol) in DMF (1.5 mL) at ambient temperature and stirred for 30 min until dissolved. Epibromohydrin (0.32 mL, 3.8 mmol) was added via syringe and

the reaction was stirred at room temperature overnight. Upon completion, the solution was partitioned between EtOAc and H<sub>2</sub>O. The aqueous layer was washed three times with EtOAc, and the combined organics were washed with saturated aqueous NaCl, dried over Na<sub>2</sub>SO<sub>4</sub>, filtered, and concentrated in vacuo. The crude residue was recrystallized from EtOAc/Hexane to afford epoxide A, 3,6-dibromo-9-(oxiran-2-ylmethyl)-9H-carbazole (80%). <sup>1</sup>H NMR (CDCl<sub>3</sub>, 500 MHz) δ 8.10 (d, 2H, *J* = 2.0 Hz), 7.54 (dd, 2H, *J* = 2.0, 8.5 Hz), 7.31 (d, 2H, *J* = 8.5 Hz), 4.62 (dd, 1H, *J* = 2.5, 16.0 Hz), 4.25 (dd, 1H, *J* = 5.5, 16.0 Hz), 3.29 (m, 1H), 2.79 (dd, 1H, *J* = 4.0, 4.5 Hz), 2.46 (dd, 1H, *J* = 2.5, 5.0 Hz). **Scheme S2.** *N*-(3-(3,6-dibromo-9H-carbazol-9-yl)-2-hydroxypropyl)-*N*-(3-methoxyphenyl)-4-nitrobenzenesulfonamide.

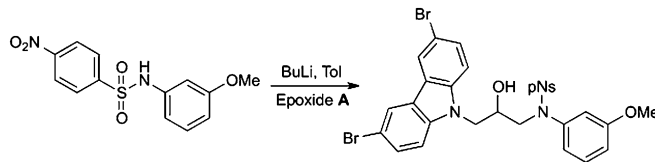

A heterogeneous mixture of *N*-(4-methoxyphenyl)-4-nitrobenzenesulfonamide (100.2 mg, 0.32 mmol) in toluene (2.5 mL, 0.13 M) under a N<sub>2</sub> atmosphere was cooled in a dry ice/acetone bath before dropwise addition of *n*-butyllithium (200 μL of 1.78 M in hexanes, 0.36 mmol). The reaction was stirred at −78 °C for 10 min before addition of epoxide A. The heterogeneous mixture was stirred at room temperature for 5 min before heating at 100 °C for 48 h. The cooled reaction was diluted with EtOAc and washed three times in 5% acetic acid solution, followed by a brine wash. The organic layer was dried over Na<sub>2</sub>SO<sub>4</sub>, filtered, and condensed. The crude mixture was purified by chromatography (SiO<sub>2</sub>, 100% CH<sub>2</sub>Cl<sub>2</sub>) to afford the ring-opened product (88%). <sup>1</sup>H NMR (CDCl<sub>3</sub>, 400 MHz) δ 8.23 (d, 2H, *J* = 8.5 Hz), 8.06 (d, 2H, *J* = 1.9 Hz), 7.65 (d, 2H, *J* = 8.5 Hz), 7.46 (dd, 2H, *J* = 1.9, 8.6 Hz), 7.22 (d, 2H, *J* = 8.8 Hz), 6.94 (d, 2H, *J* = 8.8 Hz), 6.83 (d, 2H, *J* = 9.1 Hz), 4.44 (dd, 1H, *J* = 3.6, 14.9 Hz), 4.26–4.34 (m, 1H), 4.17–4.24 (br s, 1H), 3.81 (s, 3H), 3.62–3.75 (m, 2H). ESI *m/z*: 732.0 ([M+HCOO]<sup>−</sup>, C<sub>29</sub>H<sub>24</sub>Br<sub>2</sub>N<sub>3</sub>O<sub>8</sub>S requires 732.0). **Scheme S3.** *N*-(3-(3,6-dibromo-9H-carbazol-9-yl)-2-fluoropropyl)-*N*-(3-methoxyphenyl)-4-nitrobenzenesulfonamide.

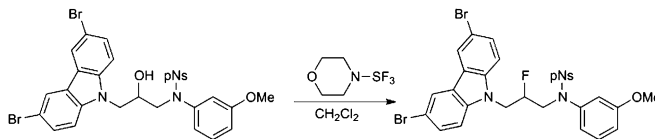

The ring-opened product from the previous step was fluorinated as follows: An oven-dried 20-mL scintillation vial containing Ns-A (18.3 mg, 0.027 mmol) was purged with N<sub>2</sub> and charged with anhydrous CH<sub>2</sub>Cl<sub>2</sub> (1.5 mL, 0.018 M). The sealed vial was cooled in a dry ice acetone bath before the dropwise addition of morpholinodithionitride (morpho-DAST, 0.053 mmol). The reaction temperature was maintained at −78 °C for 1 h and then slowly warmed to room temperature and stirred overnight. The reaction was quenched with 2.0 mL of saturated NaHCO<sub>3</sub> solution and diluted with 6 mL CH<sub>2</sub>Cl<sub>2</sub> and extracted three times. The combined organics were dried over Na<sub>2</sub>SO<sub>4</sub>, filtered, and condensed. The crude product was carried forward without further purification. <sup>1</sup>H NMR (CDCl<sub>3</sub>, 400 MHz) δ 8.28 (d, 2H, *J* = 8.0 Hz), 8.13 (s, 2H), 7.72 (d, 2H, *J* = 8.7 Hz), 7.54 (d, 2H, *J* = 8.0 Hz), 7.21 (d, 3H, *J* = 8.1 Hz), 6.89 (dd, 1H, *J* = 2.4,

PNAS PNAS PNAS PNAS

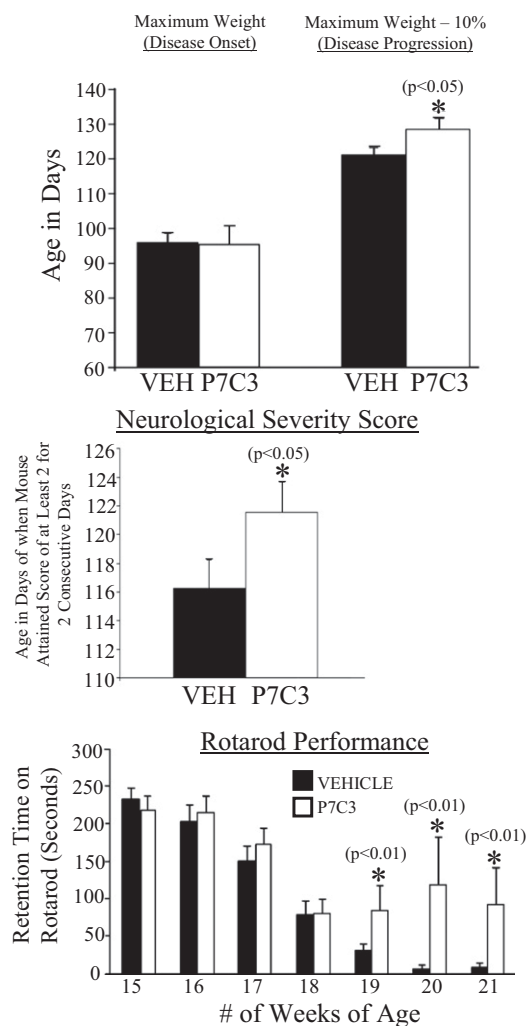

**Fig. S1.** Early administration (day 40) of P7C3 delays disease progression in G93A-SOD1 mutant mice. G93A SOD1 mice (beginning with  $n = 30$  in each group, with all mice sibling matched across treatment groups) were treated with either vehicle or P7C3 (10 mg/kg i.p. twice daily) starting at 40 d of age. P7C3-treated mice showed a significant delay in disease progression, as evidenced by the later age by which they dropped to 10% below their maximum weight. P7C3-treated mice also attained a neurological severity score of 2 at a later age than vehicle-treated mice, again indicating that P7C3 treatment slowed disease progression. This score was determined as follows: 0, full extension of hind legs away from lateral midline when the test mouse is suspended by its tail and can hold this for 2 s, suspended two to three times; 1, collapse or partial collapse of leg extension toward lateral midline (weakness) or trembling of hind legs during tail suspension; 2, toes curl under at least twice during walking of 12 inches, or any part of paw drags along cage bottom/table; 3, rigid paralysis or minimal joint movement, paw not being used for forward motion; and 4, mouse cannot right itself within 30 s from either side. With further disease progression, vehicle-treated mice showed the expected decline in retention time on the accelerating rotarod, with retention time averaged across four trials. P7C3-treated mice, however, show a consistent trend toward improved performance on this task after onset of disease, with statistically significant improvement on days 131, 138, and 145 ( $^*P < 0.001$ , Student's  $t$  test). All data shown are presented as mean  $\pm$  SEM. All analysis was conducted blind to treatment group.

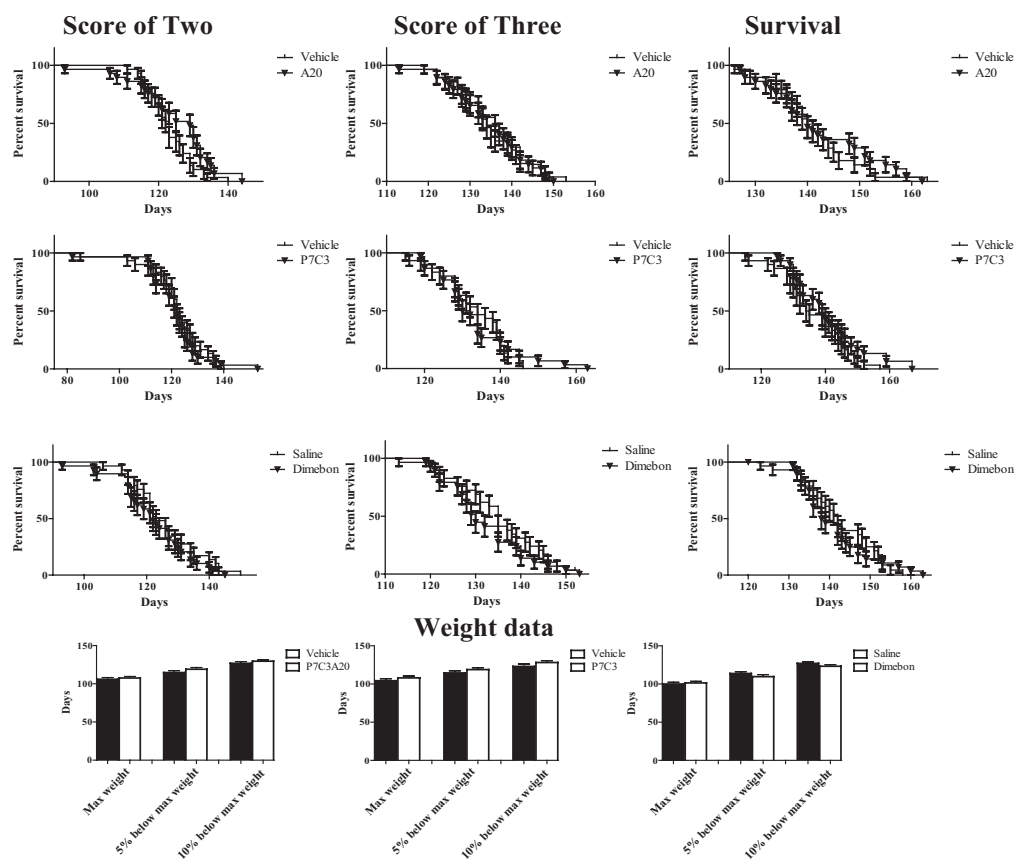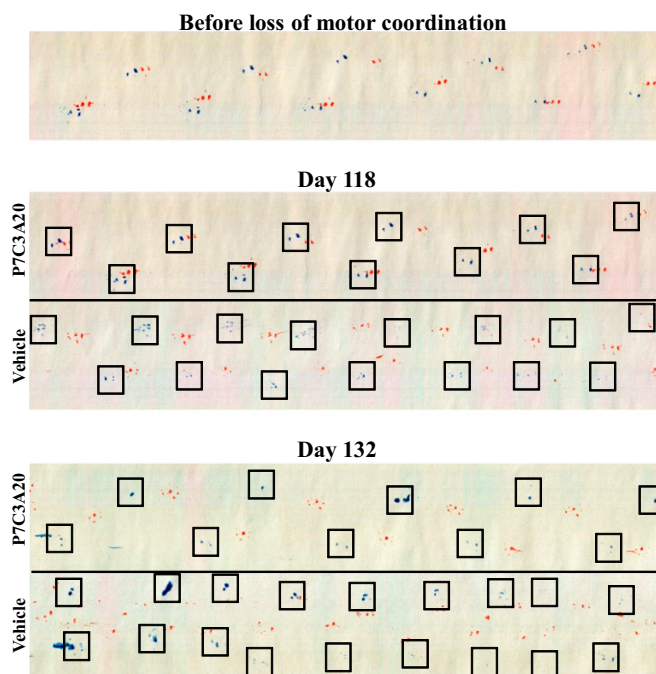

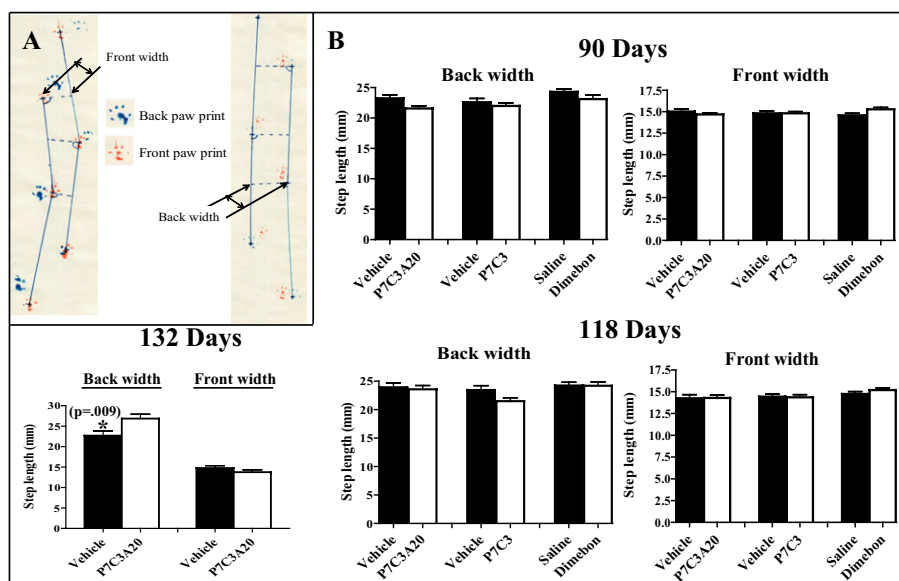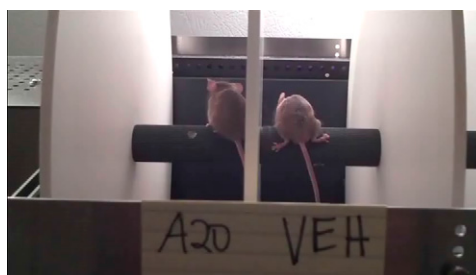

**Movie S1.** This movie shows a P7C3A20-treated mouse and the vehicle-treated sibling at 115 d of age. The vehicle-treated mouse falls off of the accelerating rotarod much earlier than the PC3A20-treated mouse.

Movie S1
